# Supplementary material for: Integrated Analysis Revealed an Inflammatory Cancer-Associated Fibroblast-Based Subtypes with Promising Implications in Predicting the Prognosis and Immunotherapeutic Response of Bladder Cancer Patients
Source: MDPI journal article supplement (doi:10.3390/ijms232415970), 2022-12-15
Supplement: s1 [file s1]

Table S1. Gene list of iCAFs-related signature

|          |          |          |          |           |          |          |           |             |
|----------|----------|----------|----------|-----------|----------|----------|-----------|-------------|
| CFD      | DCN      | MGP      | IGFBP7   | HMGA1     | CD55     | HSPD1    | TCF4      | COMP        |
| PLTP     | LUM      | VIM      | PCOLCE   | FGF7      | KRT14    | LSR      | HTRA1     | CAV1        |
| GYPC     | COL1A1   | TMEM45A  | COL5A2   | CSTB      | COL5A1   | KRT17    | THY1      | HCCAT3      |
| ELN      | RARRES2  | TACSTD2  | MXRA8    | CLEC2B    | PTRF     | TYMP     | CITED4    | ZFP36       |
| BGN      | COL1A2   | ISLR     | RARRES3  | EMILIN1   | CD99     | MTRNR2L2 | TMEM119   | PRRX1       |
| SERPINF1 | COL3A1   | DPT      | RHOF     | FTL       | CCND1    | LY6E     | IGFBP6    | NTM         |
| APOD     | C1S      | ADIRF    | IFITM2   | DBI       | FKBP1A   | CTSB     | CKS2      | ASPN        |
| SFRP2    | C1R      | TPM2     | CXCL2    | CLDN3     | CDH11    | PALLD    | HMOX1     | SULF1       |
| CTHRC1   | MMP2     | CDKN2A   | SFN      | PPARG     | HSPB1    | IDI1     | APOBEC3B  | TGFBI       |
| HSPA1A   | COL6A3   | PSCA     | AGPAT2   | HLA-B     | GPNMB    | TUBA1A   | S100A4    | FIBIN       |
| CXCL14   | NUPR1    | CTSK     | NNMT     | UPK1A     | UCP2     | MAGEA3   | KLF6      | UPK3A       |
| KRT7     | COL6A2   | AREG     | MFAP4    | VCAN      | IGFBP3   | MT1E     | PLAT      | LYPD3       |
| SERPING1 | AEBP1    | SPINK1   | C3       | PRKCDBP   | TAGLN    | GJB2     | C11orf96  | CTGF        |
| SRPX     | IGF1     | DKK1     | EDN1     | GEM       | NREP     | GADD45B  | TIMP3     | PRSS22      |
| LTBP4    | SPARC    | A2M      | SPON2    | CRISPLD2  | CCDC80   | TPM1     | CCL15     | AC015849.16 |
| NBL1     | TMEM176B | MAP1LC3A | HSPB8    | FXYD3     | MMP14    | MT2A     | KRT20     | PTGDS       |
| LSP1     | LOXL2    | HN1      | RCN3     | IGF2      | SFRP4    | POSTN    | HIST1H2BK | PLAU        |
| CLDN4    | KRT19    | CCL2     | FSTL1    | COL8A1    | FBLN1    | TINAGL1  | OLFML3    | KIAA0101    |
| COL6A1   | IGFBP5   | IFITM1   | UPK2     | TMEM147   | MAL      | GATA3    | TGFB11    | CLIC3       |
| MMP23B   | CALD1    | ELF3     | PTMS     | TNFRSF12A | MAL2     | CFH      | HMGB3     | RBP1        |
| TNFAIP6  | PLA2G2A  | CRYAB    | IDH1     | TOMM40    | FHL2     | SET      | FOS       | GUCA2A      |
| SELM     | GAS6     | LGALS3BP | SEPP1    | AXL       | PDLIM3   | PDGFRB   | FILIP1L   | HIST1H1C    |
| C7       | TFPI     | CLU      | SOD2     | ID1       | IRF1     | MMP11    | PCNA      |             |
| PLAC9    | PRNP     | IGFBP4   | EMP3     | WASH4P    | RGCC     | MARCKS   | HMGB2     |             |
| CLEC11A  | CYGB     | P4HA2    | NID2     | GPX1      | GSN      | SDC2     | TUBA1B    |             |
| IFITM3   | LHFP     | COX7A1   | UPK3B    | ID2       | THBS2    | INHBA    | ARHGAP29  |             |
| KRT8     | S100P    | RGS16    | CYBA     | EGR1      | ADM      | NQO1     | PODN      |             |
| SPINT2   | SPARCL1  | ECM1     | MYL9     | ARL6IP1   | C20orf24 | CKS1B    | GJA1      |             |
| IFI16    | CXCL12   | SERPINE2 | IL32     | TMEM176A  | AMIGO2   | MYADM    | SPTSSB    |             |
| C19orf33 | MEG3     | PERP     | SERPINH1 | GDPD3     | CD248    | PKIG     | IER3      |             |
| TIMP1    | UPK1B    | CST6     | EEF2     | MFAP2     | PNRC1    | FAP      | MYCL      |             |
| KRT18    | HSD17B2  | CRCT1    | HLA-A    | PDPN      | SAT1     | FBLN2    | S100A14   |             |
